# Supplementary material for: Intrauterine contraception in nulliparous women: a prospective survey
Source: PubMed Central journal article supplement — J Fam Plann Reprod Health Care. 2015 Apr 8;42(1):36–42. doi: 10.1136/jfprhc-2014-101046 (PMC4717389; doi:10.1136/jfprhc-2014-101046), 2015-04-08
Supplement: jfprhc-2014-101046-s1.pdf [file jfprhc-2014-101046-s1.pdf]

Supplemental Material: Pregnancy, Expulsion, and Continuation Rates in Other Studies

**12-Month Rates for Expulsions, Pregnancies, and Continuation**

| <b>Studies with &gt;15 nulliparas using devices currently available in the United States</b> |                                |               |                      |           |                                   |                                     |
|----------------------------------------------------------------------------------------------|--------------------------------|---------------|----------------------|-----------|-----------------------------------|-------------------------------------|
| Author                                                                                       | Nulliparas<br>n (%)            | Study design  | IUD Types            | Expulsion | Pregnancy                         | Continuation                        |
| Gemzell-Danielsson et al. 2012[26]                                                           | 58 (23)                        | randomized    | LNG-IUS              | 1.6%*     | 0                                 | 71%* at 3 years                     |
| Suhonen et al. 2004 [9]                                                                      | 94 (100)                       | randomized    | LNG-IUS              | 1.1%      | 0                                 | 79%                                 |
| Otero-Flores et al. 2003[10]                                                                 | 390 (100)                      | randomized    | Cu T 380A            | 3.3%      | 1%                                | 29%                                 |
| Brockmeyer et al. 2008[8]                                                                    | 113 (100)                      | prospective   | Various              | 7%        | 0                                 | 72%                                 |
| Armitage et al. 2013[6]                                                                      | 97 (100)                       | prospective   | LNG-IUS              | 4%        | 0                                 | 85%                                 |
| Peipert et al. 2011 & Winner et al. 2012[11, 27]                                             | 853 (28)                       | prospective   | LNG-IUS<br>Cu T 380A | 3.5%*     | 0.3%*                             | 88% LNG*<br>84% Cu T*               |
| Marions et al. 2011[7]                                                                       | 134 (100)                      | prospective   | LNG-IUS              |           | 0                                 | 76%                                 |
| Aoun et al. 2014[28]                                                                         | 273 (13)                       | retrospective | LNG-IUS<br>Cu T 380A | 4%*       | 0.4%*                             | 81%*                                |
| Brown et al. 2014[15]                                                                        | 62 (37)                        | retrospective | Various              | 6.5%      | 0                                 | 81%* at 2 months                    |
| Berenson et al. 2013[29]                                                                     | NR                             | retrospective | LNG-IUS<br>Cu T 380A |           | 1.8% LNG*<br>3.0% Cu T*           | 88% LNG**<br>84% Cu T**             |
| Bayer et al. 2012[23]                                                                        | 238 (78)                       | retrospective | LNG-IUS<br>Cu T 380A | 3.1%      | 0                                 | 83%* at 6 months                    |
| Veldhuis et al. 2004[30]                                                                     | 142 (100)                      | retrospective | Various              | 0-3%      | 0                                 | 68%                                 |
| Farmer et al. 2003[31]                                                                       | 103 (19)                       | retrospective | Various              | 5.8%*     |                                   |                                     |
| <b>Studies in adolescents and young women with &lt;15 nulliparas</b>                         |                                |               |                      |           |                                   |                                     |
|                                                                                              | Population                     | Study design  | IUD Types            | Expulsion | Pregnancy                         | Continuation                        |
| Godfrey et al. 2010[32]                                                                      | 23 adolescents                 | randomized    | LNG-IUS<br>Cu T 380A |           |                                   | 75% LNG*<br>45% Cu *<br>at 6 months |
| Lara-Torre et al. 2011[33]                                                                   | 89 adolescents and young women | retrospective | LNG-IUS<br>Cu T 380A |           | 2% overall*<br>17% Cu T<br>0% LNG | 67% LNG*<br>41% Cu T*               |

All rates are for twelve months and for nulliparas only unless otherwise specified.

NR, not reported.

Various, at least one of the two devices available in the U.S. was used, along with other devices available in the E.U.

\* Rate for events in total study population, not just nulliparas. Authors report no significant difference based on parity.

\*\* Rate calculated using only known discontinuations based on claims data and is therefore an overestimate due to inability to account for loss to follow-up.
