# Supplementary figures and images for: Intrauterine contraception in nulliparous women: a prospective survey
Source: PubMed Central journal article supplement — J Fam Plann Reprod Health Care. 2015 Apr 8;42(1):36–42. doi: 10.1136/jfprhc-2014-101046 (PMC4717389; doi:10.1136/jfprhc-2014-101046), 2015-04-08

**Supplemental Material: Response Rates**

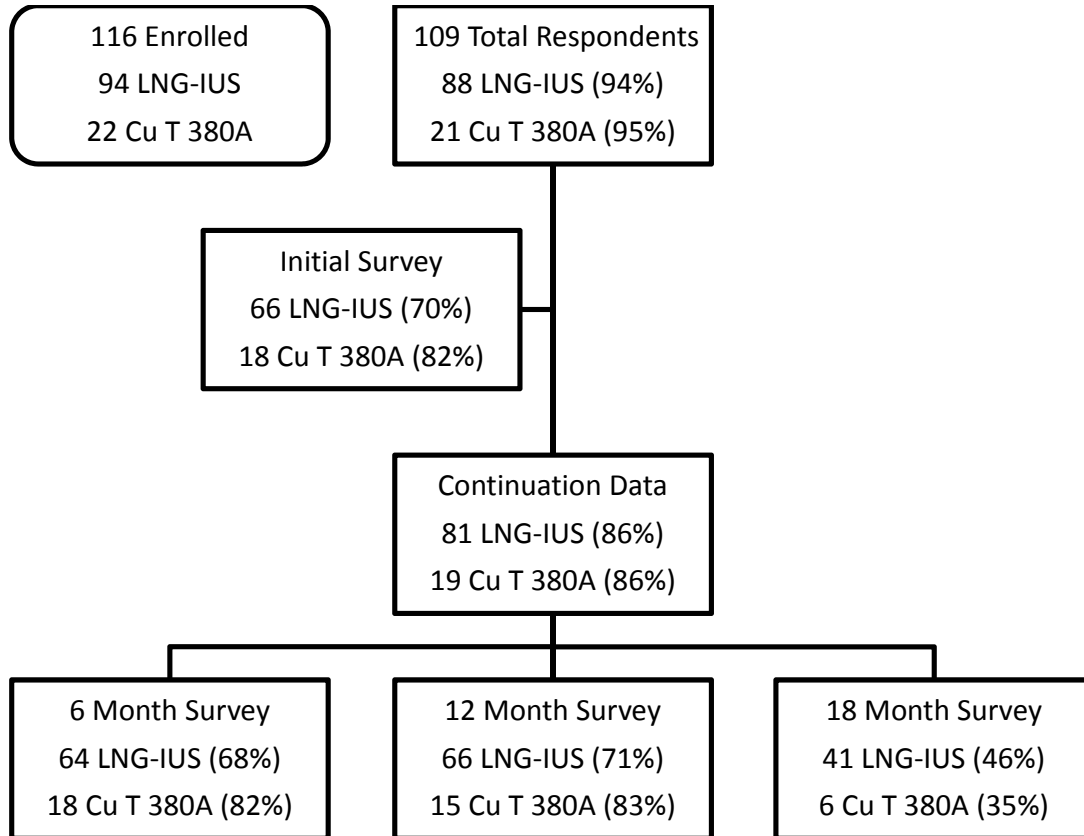

Supplement: jfprhc-2014-101046-s2.pdf [file jfprhc-2014-101046-s2.pdf]
